# Supplementary material
Source: PubMed Central journal article supplement (PMC3517124)

## Supporting Information

### Supporting Materials and Methods

**Realtime PCR primers.** GAPD: Forward: 5'CTGGAGAAACCTGCCAAGTA, reverse: 5'TGTTGCTGTAGCCGTATTCA; IL-17A [1]: 5'CTCCAGAAGGCCCTCAGACTAC, 5'AGCTTTCCTCCGCATTGACACAG; IL-17F [1]: 5'GAGGATAACACTGTGAGAGTTGAC, 5'GAGTTCATGGTGCTGTCTTCC; IL-22: 5'CATGCAGGAGGTGGTACCTT, 5'CAGACGCAAGCATTCTCAG; IL-23R: 5'TCAGTGCTACAATCTTCAGAGG, 5'GCCAAGAAGACCATTCCCGA; IRF4: 5'GCAATGGGAAACTCCGACAGT, 5'CAGCGTCCTCCTCACGATTGT; ROR $\alpha$  [2]: 5'CAATGCCACCTACTCCTGTCC, 5'GCCAGGCATTCTGCAGC; ROR $\gamma$ t [1]: 5'GACAGGGAGCCAAGTTCTCA, 5'CTTGTCCCCACAGATCTTGCA; T-bet: 5'ACCAGAGCGGCAAGTGGG, 5'TGGACATATAAGCGGTTCCCTG.

***In vivo* proliferation assay.** Spleen and peripheral lymph nodes were isolated from Ctrl (*Stim1<sup>fl/fl</sup>*) and *Stim1<sup>fl/fl</sup> Cd4-Cre* mice (C57BL/6 background), red blood cells lysed by hypotonic shock and a single-cell suspension prepared that was labeled with 2.5  $\mu$ M CFSE (Invitrogen) for 5 min at room temperature.  $2 \times 10^7$  CFSE-labeled cells were injected i.v. into irradiated (10 Gy) Balb/c mice. Three days later, the recipient mice were sacrificed, splenocytes and peripheral lymph node cells recovered and analyzed by flow cytometry.

***In vitro* proliferation.** T<sub>H</sub>1 and T<sub>H</sub>17 cells were generated as described in the main text. On day 3 of culture, 20 U/ml IL-2 was added to the medium in addition to the cytokine

supplements used for differentiation of T<sub>H</sub>1 and T<sub>H</sub>17 cells. T cells were cultured for a total of 8 days in Iscove's modified Dulbecco's medium containing 2 mM L-glutamine, 50 μM β-mercaptoethanol, 100 U/ml penicillin, 100 μg/ml streptomycin and 10% FBS. Cells numbers were obtained on days 0, 4, 6 and 8.

**Analysis of cell death.** T<sub>H</sub>1 and T<sub>H</sub>17 cells were pretreated with Fc block (anti-CD16/32, clone 93, eBioscience) and incubated with eFluor 450- conjugated anti-mouse CD4 antibody (L3T4, eBioscience). For analysis of Fas and FasL expression, cells were stained with PE-conjugated anti-mouse CD95 (15A7, eBioscience) and biotin-conjugated anti-mouse CD95L (clone MFL3, eBioscience) antibody followed by APC-conjugated streptavidin (Invitrogen). For analysis of cell death, cells were stained with FITC-conjugated Annexin V and propidium iodide using an apoptosis detection kit (BD Biosciences) according to the manufacturer's instructions. Cells were analyzed using a LSRII cytometer (BD Biosciences) and FlowJo software (Treestar, Ashland, OR).

## Supporting Figures

**Supporting Information Figure 1. Reduced numbers of STIM2 deficient T cells in the CNS, lymph nodes and spleen of *Rag2*<sup>-/-</sup> mice after adoptive cotransfer.** EAE was induced in *Rag2*<sup>-/-</sup> mice by adoptive transfer of mononuclear cells from MOG<sub>35-55</sub> immunized CD45.1<sup>+</sup> wild-type Ctrl mice, CD45.2<sup>+</sup> *Stim2*<sup>fl/fl</sup> *Cd4-Cre* mice or cotransfer of both as described in Figure 5A. Mononuclear cells were harvested on day 12 after immunization with MOG<sub>35-55</sub> and restimulated *in vitro* with MOG<sub>35-55</sub> and IL-23 for 3 days; 2 x 10<sup>7</sup> cells were transferred to *Rag2*<sup>-/-</sup> mice. Mononuclear cells were isolated from the CNS of recipient mice on day 14 after transfer and analyzed for CD45.2 and CD45.1 expression. Shown are the results of one representative experiment (A) and the averaged results from three mice (B). Abbreviation: *Stim2*<sup>KO</sup>, *Stim2*<sup>fl/fl</sup> *Cd4-Cre*.

**Supporting Information Figure 2. Normal short-term proliferation of STIM1 deficient T cells *in vivo*.** 2x10<sup>7</sup> T cells isolated from lymph nodes and spleen of Ctrl (*Stim1*<sup>fl/fl</sup>) and *Stim1*<sup>fl/fl</sup> *Cd4-Cre* mice (both C57BL/6) were labeled with CFSE and injected into irradiated (10 Gy) Balb/c mice. 3 days later, T cells were recovered from lymph nodes and spleen of Balb/c mice and analyzed for CFSE dilution by flow cytometry. Histograms show CFSE<sup>+</sup> CD4<sup>+</sup> or CFSE<sup>+</sup> CD8<sup>+</sup> T cells of donor origin. Numbers represent the percentages of proliferating T cells from one experiment.

**Supporting Information Figure 3. STIM1 deficient T<sub>H</sub>17 cells fail to expand *in vitro* despite normal viability.** CD4<sup>+</sup> T cells were isolated from spleen and lymph nodes of Ctrl (*Stim1*<sup>fl/fl</sup>) and *Stim1*<sup>fl/fl</sup> *CD4-Cre* mice. For T<sub>H</sub>1 and T<sub>H</sub>17 differentiation, 2 x 10<sup>6</sup> and

1 x 10<sup>6</sup> CD4<sup>+</sup> cells, respectively, were stimulated with anti-CD3 and anti-CD28 under polarizing conditions and cultured for 8 days. **A**, Percent Annexin V<sup>+</sup> (solid lines) and Annexin V<sup>+</sup>, PI<sup>+</sup> (dashed lines) of T<sub>H</sub>1 or T<sub>H</sub>17 cells on days 4, 6 and 8 of culture. **B**, Percent Fas<sup>+</sup> (solid lines) and FasL<sup>+</sup> (dashed lines) of T<sub>H</sub>1 or T<sub>H</sub>17 cells on days 4, 6 and 8 of culture. **C**, Total cell numbers of T<sub>H</sub>1 and T<sub>H</sub>17 cells on days 0, 4, 6 and 8 of culture. Results are representative of T cells derived from three mice in each group cultured separately. Error bars, SEM. Abbreviations: PI, propidium iodide.

**Supporting Information Figure 4. Comparable CXCR3 and CCR7 chemokine receptor expression on STIM1 deficient and Ctrl T<sub>H</sub>N cells.** CD4<sup>+</sup> T cells from Ctrl (*Stim1<sup>fl/fl</sup>*) and *Stim1<sup>fl/fl</sup> Cd4-Cre* mice were cultured *in vitro* for 6 days under non-polarizing (T<sub>H</sub>N) conditions. Cells were stained with antibodies to CD4, CXCR3 and CCR7 and analyzed by flow cytometry. Shown are data from one representative experiment (left) and averages of 11 (Ctrl) and 5 (*Stim1<sup>fl/fl</sup> Cd4-Cre*) repeat experiments (right). Error bars, SEM. AU, arbitrary units.

### Supporting References

- 1 **Ivanov, II, McKenzie, B. S., Zhou, L., Tadokoro, C. E., Lepelley, A., Lafaille, J. J., Cua, D. J. and Littman, D. R.**, The orphan nuclear receptor ROR $\gamma$  directs the differentiation program of proinflammatory IL-17+ T helper cells. *Cell* 2006. **126**: 1121-1133.
- 2 **Lau, P., Nixon, S. J., Parton, R. G. and Muscat, G. E.**, ROR $\alpha$  regulates the expression of genes involved in lipid homeostasis in skeletal muscle cells: caveolin-3 and CPT-1 are direct targets of ROR. *J Biol Chem* 2004. **279**: 36828-36840.

**A**

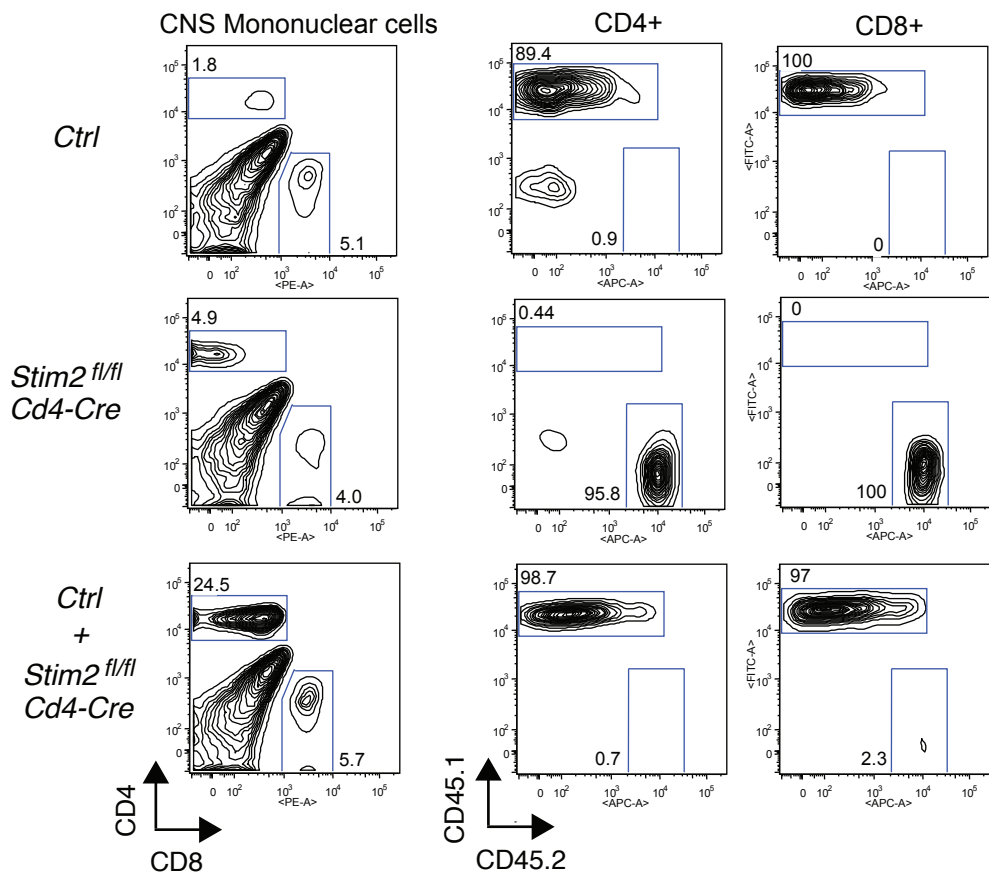

**B**

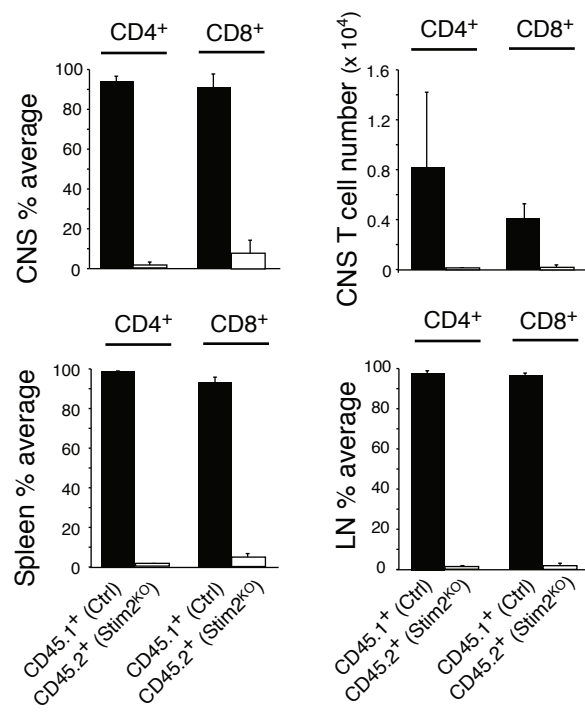

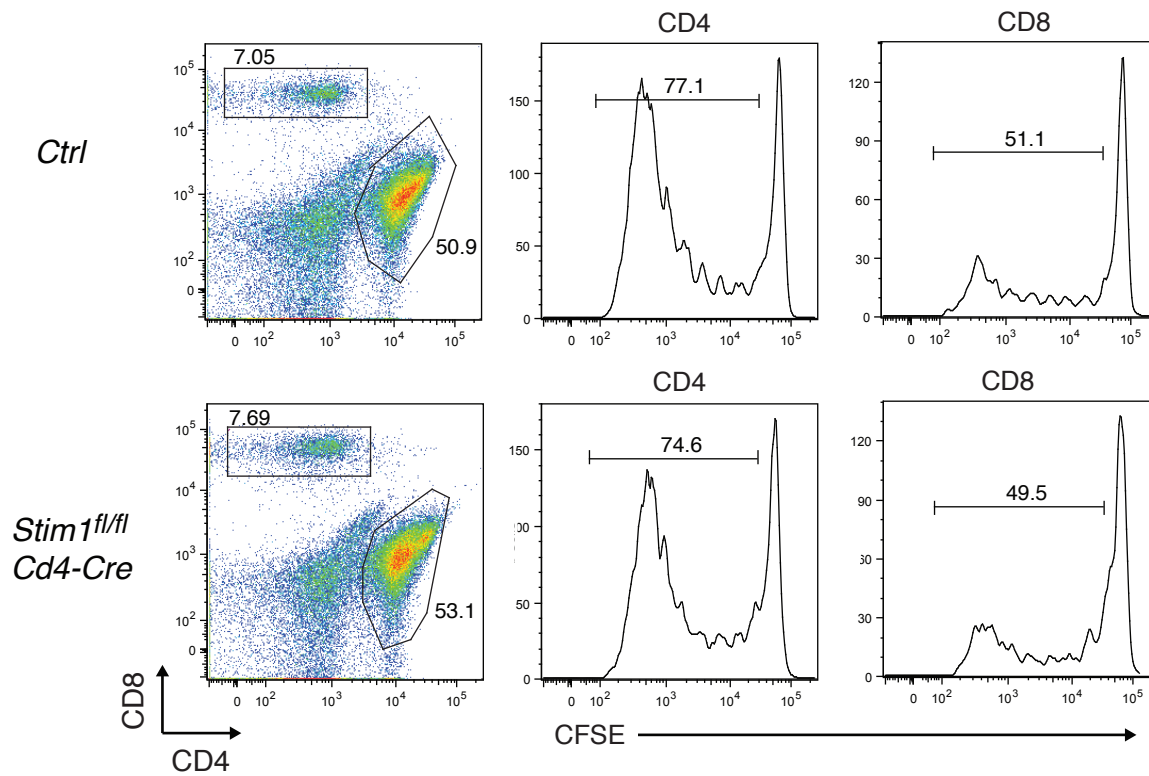

**A**

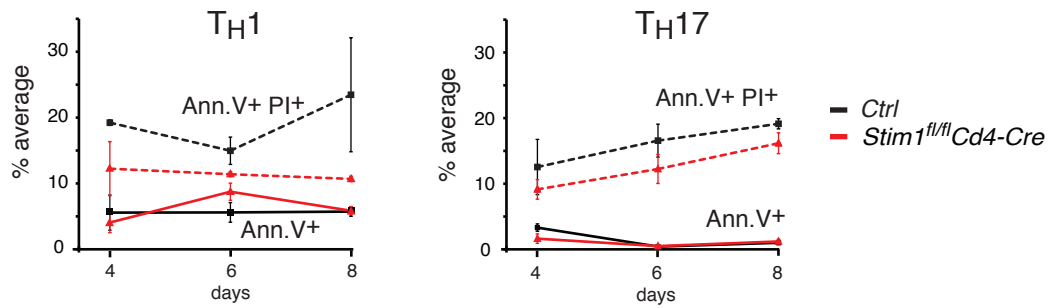

**B**

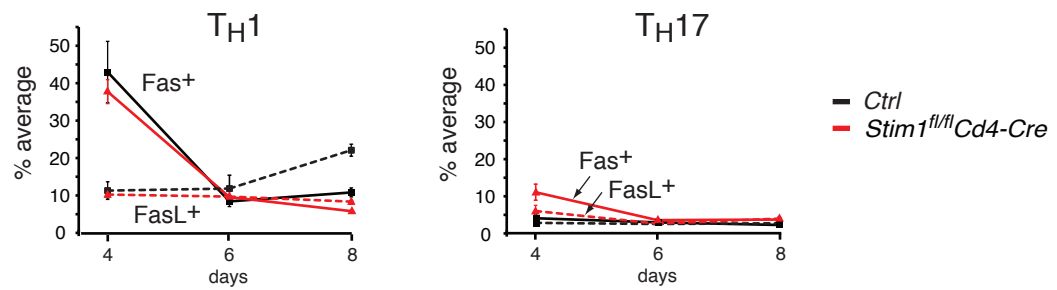

**C**

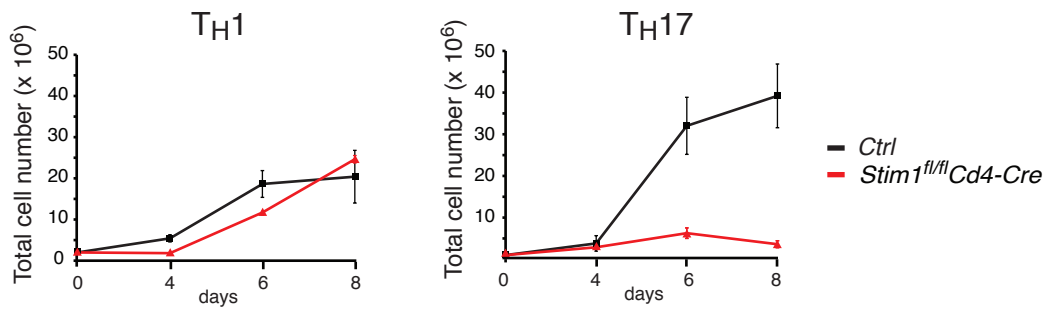

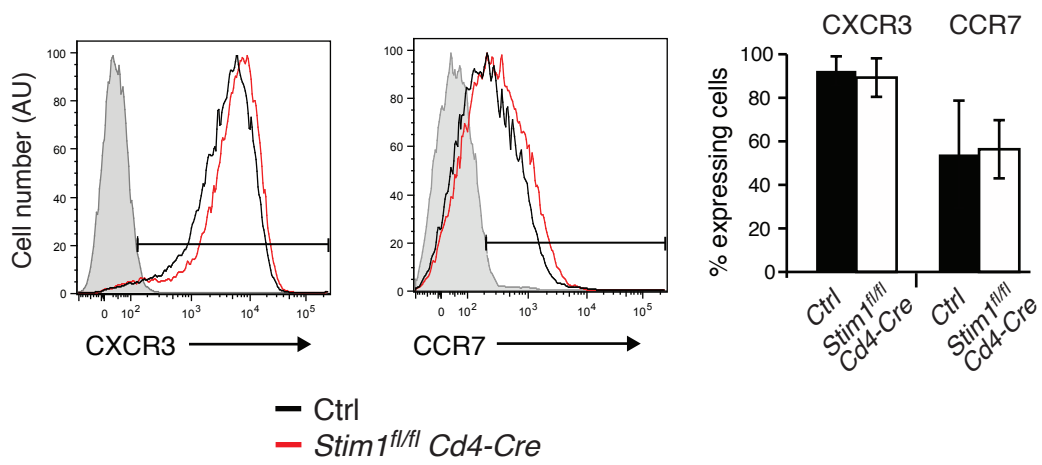

Supplement: NIHMS400101-supplement-Supporting_Information.pdf [file NIHMS400101-supplement-Supporting_Information.pdf]
